# Supplementary material
Source: PubMed Central journal article supplement (PMC7110558)
Supplement: mmc1.pdf [file mmc1.pdf]

**Molecular Cell**

**Supplemental Information**

**The Promise of Proteomics  
for the Study of ADP-Ribosylation**

**Casey M. Daniels, Shao-En Ong, and Anthony K.L. Leung**

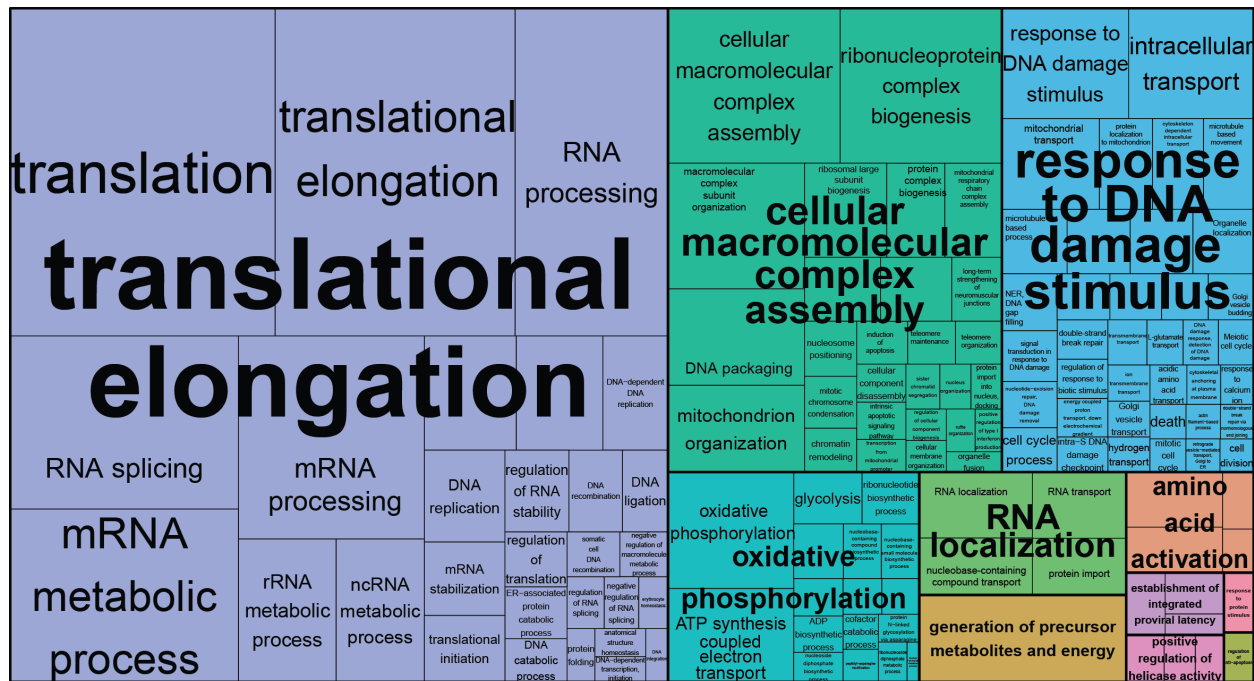

**Figure S1. Processes enriched in the ADP-ribosylated interactome (full table of Figure 2B).** Gene ontology determined using DAVID, treemap constructed using REViGO and R. Source data available in Table S2.

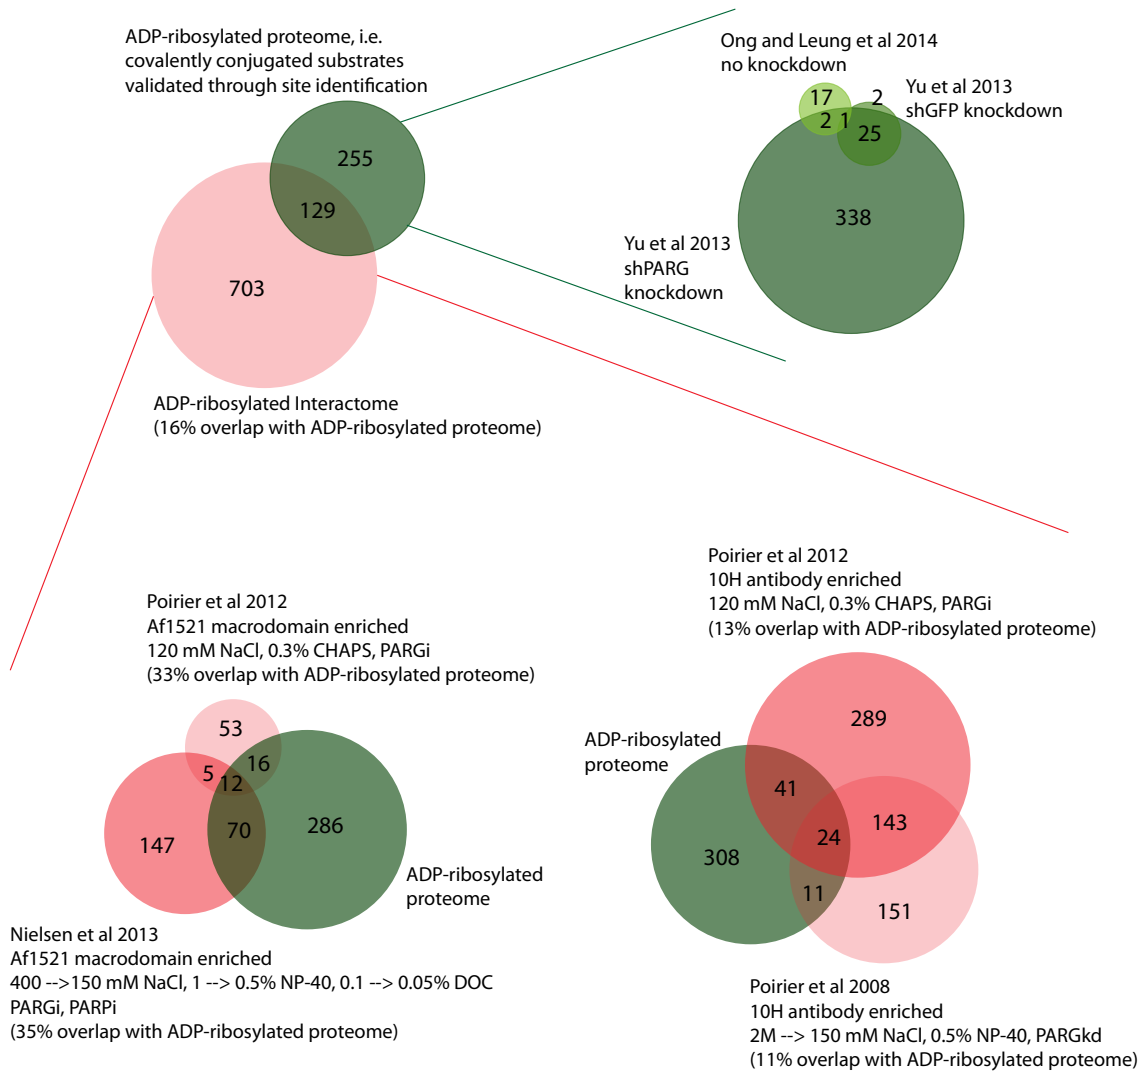

**Figure S2. Comparing the ADP-ribosylated interactomes with the known ADP-ribosylated proteomes.** PARGi, PARG inhibitor; PARPi, PARP inhibitor; PARGkd, PARG knockdown. Interactome studies, including protein extraction and enrichment conditions, are described in detail in Figure 2A. Source data available in Table S2.

**Table S1. Functions attributed to PARP family members**

Supporting examples from the literature for the connection made between each PARP and each cellular process in Figure 1.

| PARP | Genome Maintenance       | Transcription              | Translation and mRNA stability | Cell cycle                | Cell death              | Cell structure and motility | Transport               | Metabolism            | Cell signaling             |
|------|--------------------------|----------------------------|--------------------------------|---------------------------|-------------------------|-----------------------------|-------------------------|-----------------------|----------------------------|
| 1    | (de Murcia et al., 1997) | (Kraus and Hottiger, 2013) |                                | (Saxena et al., 2002)     | (Hong et al., 2004)     |                             |                         | (Bai and Canto, 2012) | (Andreone et al., 2003)    |
| 2    | (Ame et al., 1999)       | (Szanto et al., 2012)      |                                | (Liang et al., 2013)      | (Li et al., 2010)       |                             |                         | (Bai and Canto, 2012) | (Wyrsh et al., 2012)       |
| 3    | (Boehler et al., 2011)   | (Rouleau et al., 2011)     |                                | (Augustin et al., 2003)   |                         |                             |                         |                       |                            |
| 4    |                          |                            |                                | (Kickhoefer et al., 1999) |                         |                             | (van Zon et al., 2003)  |                       |                            |
| 5a   | (Smith et al., 1998)     |                            | (Leung et al., 2011)           | (Chang et al., 2005)      | (Bae et al., 2003)      |                             | (Yeh et al., 2007)      |                       | (Huang et al., 2009)       |
| 5b   | (Cook et al., 2002)      |                            |                                |                           | (Kaminker et al., 2001) |                             |                         |                       | (Huang et al., 2009)       |
| 6    |                          |                            |                                | (Tuncel et al., 2012)     |                         |                             |                         |                       |                            |
| 7    |                          | (MacPherson et al., 2013)  |                                | (Roper et al., 2014)      |                         |                             |                         |                       |                            |
| 8    |                          |                            |                                |                           |                         |                             |                         |                       |                            |
| 9    | (Yan et al., 2013)       | (Aguiar et al., 2005)      |                                |                           |                         |                             |                         |                       | (Juszczynski et al., 2006) |
| 10   | (Nicolae et al., 2014)   | (Yu et al., 2005)          |                                | (Chou et al., 2006)       | (Herzog et al., 2013)   |                             |                         |                       | (Verheugd et al., 2013)    |
| 11   |                          |                            |                                |                           |                         | (Meyer-Ficca et al., 2015)  |                         |                       |                            |
| 12   |                          |                            | (Welsby et al., 2014)          |                           |                         |                             |                         |                       | (Atasheva et al., 2014)    |
| 13   |                          |                            | (Leung et al., 2011)           |                           |                         |                             |                         |                       | (Hayakawa et al., 2011)    |
| 14   | (Nicolae et al., 2015)   | (Mehrotra et al., 2011)    | (Iqbal et al., 2014)           |                           |                         | (Vyas et al., 2013)         |                         | (Cho et al., 2011)    | (Goenka and Boothby, 2006) |
| 15   |                          | (Aguiar et al., 2005)      | (Leung et al., 2011)           |                           |                         |                             |                         |                       |                            |
| 16   |                          |                            |                                |                           |                         |                             | (Di Paola et al., 2012) |                       | (Jwa and Chang, 2012)      |

### References for supporting examples of PARP functions:

- Aguiar, R.C., Takeyama, K., He, C., Kreinbrink, K., and Shipp, M.A. (2005). B-aggressive lymphoma family proteins have unique domains that modulate transcription and exhibit poly(ADP-ribose) polymerase activity. *The Journal of biological chemistry* *280*, 33756-33765.
- Ame, J.C., Rolli, V., Schreiber, V., Niedergang, C., Apiou, F., Decker, P., Muller, S., Hoger, T., Menissier-de Murcia, J., and de Murcia, G. (1999). PARP-2, A novel mammalian DNA damage-dependent poly(ADP-ribose) polymerase. *J Biol Chem* *274*, 17860-17868.
- Andreone, T.L., O'Connor, M., Denenberg, A., Hake, P.W., and Zingarelli, B. (2003). Poly(ADP-ribose) polymerase-1 regulates activation of activator protein-1 in murine fibroblasts. *Journal of immunology* *170*, 2113-2120.
- Atasheva, S., Frolova, E.I., and Frolov, I. (2014). Interferon-stimulated poly(ADP-Ribose) polymerases are potent inhibitors of cellular translation and virus replication. *J Virol* *88*, 2116-2130.
- Augustin, A., Spenlehauer, C., Dumond, H., Menissier-De Murcia, J., Piel, M., Schmit, A.C., Apiou, F., Vonesch, J.L., Kock, M., Bornens, M., *et al.* (2003). PARP-3 localizes preferentially to the daughter centriole and interferes with the G1/S cell cycle progression. *Journal of cell science* *116*, 1551-1562.
- Bae, J., Donigian, J.R., and Hsueh, A.J. (2003). Tankyrase 1 interacts with Mcl-1 proteins and inhibits their regulation of apoptosis. *The Journal of biological chemistry* *278*, 5195-5204.
- Bai, P., and Canto, C. (2012). The role of PARP-1 and PARP-2 enzymes in metabolic regulation and disease. *Cell metabolism* *16*, 290-295.
- Boehler, C., Gauthier, L.R., Mortusewicz, O., Biard, D.S., Saliou, J.M., Bresson, A., Sanglier-Cianferani, S., Smith, S., Schreiber, V., Boussin, F., *et al.* (2011). Poly(ADP-ribose) polymerase 3 (PARP3), a newcomer in cellular response to DNA damage and mitotic progression. *Proceedings of the National Academy of Sciences of the United States of America* *108*, 2783-2788.
- Chang, P., Coughlin, M., and Mitchison, T.J. (2005). Tankyrase-1 polymerization of poly(ADP-ribose) is required for spindle structure and function. *Nat Cell Biol* *7*, 1133-1139.
- Cho, S.H., Ahn, A.K., Bhargava, P., Lee, C.H., Eischen, C.M., McGuinness, O., and Boothby, M. (2011). Glycolytic rate and lymphomagenesis depend on PARP14, an ADP ribosyltransferase of the B aggressive lymphoma (BAL) family. *Proceedings of the National Academy of Sciences of the United States of America* *108*, 15972-15977.
- Chou, H.Y., Chou, H.T., and Lee, S.C. (2006). CDK-dependent activation of poly(ADP-ribose) polymerase member 10 (PARP10). *The Journal of biological chemistry* *281*, 15201-15207.
- Cook, B.D., Dynek, J.N., Chang, W., Shostak, G., and Smith, S. (2002). Role for the related poly(ADP-Ribose) polymerases tankyrase 1 and 2 at human telomeres. *Molecular and cellular biology* *22*, 332-342.
- de Murcia, J.M., Niedergang, C., Trucco, C., Ricoul, M., Dutrillaux, B., Mark, M., Oliver, F.J., Masson, M., Dierich, A., LeMeur, M., *et al.* (1997). Requirement of poly(ADP-ribose) polymerase in recovery from DNA damage in mice and in cells. *Proceedings of the National Academy of Sciences of the United States of America* *94*, 7303-7307.
- Di Paola, S., Micaroni, M., Di Tullio, G., Buccione, R., and Di Girolamo, M. (2012). PARP16/ARTD15 is a novel endoplasmic-reticulum-associated mono-ADP-ribosyltransferase that interacts with, and modifies karyopherin-ss1. *PloS one* *7*, e37352.
- Goenka, S., and Boothby, M. (2006). Selective potentiation of Stat-dependent gene expression by collaborator of Stat6 (CoaSt6), a transcriptional cofactor. *Proceedings of the National Academy of Sciences of the United States of America* *103*, 4210-4215.
- Hayakawa, S., Shiratori, S., Yamato, H., Kameyama, T., Kitatsuji, C., Kashigi, F., Goto, S., Kameoka, S., Fujikura, D., Yamada, T., *et al.* (2011). ZAPS is a potent stimulator of signaling mediated by the RNA helicase RIG-I during antiviral responses. *Nature immunology* *12*, 37-44.
- Herzog, N., Hartkamp, J.D., Verheugd, P., Treude, F., Forst, A.H., Feijs, K.L., Lippok, B.E., Kremmer, E., Kleine, H., and Luscher, B. (2013). Caspase-dependent cleavage of the mono-ADP-ribosyltransferase ARTD10 interferes with its pro-apoptotic function. *FEBS J* *280*, 1330-1343.
- Hong, S.J., Dawson, T.M., and Dawson, V.L. (2004). Nuclear and mitochondrial conversations in cell death: PARP-1 and AIF signaling. *Trends in pharmacological sciences* *25*, 259-264.

- Huang, S.M., Mishina, Y.M., Liu, S., Cheung, A., Stegmeier, F., Michaud, G.A., Charlat, O., Wiелlette, E., Zhang, Y., Wiessner, S., *et al.* (2009). Tankyrase inhibition stabilizes axin and antagonizes Wnt signalling. *Nature* *461*, 614-620.
- Iqbal, M.B., Johns, M., Cao, J., Liu, Y., Yu, S.C., Hyde, G.D., Laffan, M.A., Marchese, F.P., Cho, S.H., Clark, A.R., *et al.* (2014). PARP-14 combines with tristetraprolin in the selective posttranscriptional control of macrophage tissue factor expression. *Blood* *124*, 3646-3655.
- Juszczynski, P., Kutok, J.L., Li, C., Mitra, J., Aguiar, R.C., and Shipp, M.A. (2006). BAL1 and BBAP are regulated by a gamma interferon-responsive bidirectional promoter and are overexpressed in diffuse large B-cell lymphomas with a prominent inflammatory infiltrate. *Molecular and cellular biology* *26*, 5348-5359.
- Jwa, M., and Chang, P. (2012). PARP16 is a tail-anchored endoplasmic reticulum protein required for the PERK- and IRE1alpha-mediated unfolded protein response. *Nature cell biology* *14*, 1223-1230.
- Kaminker, P.G., Kim, S.H., Taylor, R.D., Zebarjadian, Y., Funk, W.D., Morin, G.B., Yaswen, P., and Campisi, J. (2001). TANK2, a new TRF1-associated poly(ADP-ribose) polymerase, causes rapid induction of cell death upon overexpression. *The Journal of biological chemistry* *276*, 35891-35899.
- Kickhoefer, V.A., Siva, A.C., Kedersha, N.L., Inman, E.M., Ruland, C., Streuli, M., and Rome, L.H. (1999). The 193-kD vault protein, VPARP, is a novel poly(ADP-ribose) polymerase. *J Cell Biol* *146*, 917-928.
- Kraus, W.L., and Hottiger, M.O. (2013). PARP-1 and gene regulation: progress and puzzles. *Molecular aspects of medicine* *34*, 1109-1123.
- Leung, A.K., Vyas, S., Rood, J.E., Bhutkar, A., Sharp, P.A., and Chang, P. (2011). Poly(ADP-ribose) regulates stress responses and microRNA activity in the cytoplasm. *Mol Cell* *42*, 489-499.
- Li, X., Klaus, J.A., Zhang, J., Xu, Z., Kibler, K.K., Andrabi, S.A., Rao, K., Yang, Z.J., Dawson, T.M., Dawson, V.L., *et al.* (2010). Contributions of poly(ADP-ribose) polymerase-1 and -2 to nuclear translocation of apoptosis-inducing factor and injury from focal cerebral ischemia. *Journal of neurochemistry* *113*, 1012-1022.
- Liang, Y.C., Hsu, C.Y., Yao, Y.L., and Yang, W.M. (2013). PARP-2 regulates cell cycle-related genes through histone deacetylation and methylation independently of poly(ADP-ribosylation). *Biochemical and biophysical research communications* *431*, 58-64.
- MacPherson, L., Tamblyn, L., Rajendra, S., Bralha, F., McPherson, J.P., and Matthews, J. (2013). 2,3,7,8-Tetrachlorodibenzo-p-dioxin poly(ADP-ribose) polymerase (TiPARP, ARTD14) is a mono-ADP-ribosyltransferase and repressor of aryl hydrocarbon receptor transactivation. *Nucleic acids research* *41*, 1604-1621.
- Mehrotra, P., Riley, J.P., Patel, R., Li, F., Voss, L., and Goenka, S. (2011). PARP-14 functions as a transcriptional switch for Stat6-dependent gene activation. *J Biol Chem* *286*, 1767-1776.
- Meyer-Ficca, M.L., Ihara, M., Bader, J.J., Leu, N.A., Beneke, S., and Meyer, R.G. (2015). Spermatid head elongation with normal nuclear shaping requires ADP-ribosyltransferase PARP11 (ARTD11) in mice. *Biol Reprod* *92*, 80.
- Nicolae, C.M., Aho, E.R., Choe, K.N., Constantin, D., Hu, H.J., Lee, D., Myung, K., and Moldovan, G.L. (2015). A novel role for the mono-ADP-ribosyltransferase PARP14/ARTD8 in promoting homologous recombination and protecting against replication stress. *Nucleic Acids Res* *43*, 3143-3153.
- Nicolae, C.M., Aho, E.R., Vlahos, A.H., Choe, K.N., De, S., Karras, G.I., and Moldovan, G.L. (2014). The ADP-ribosyltransferase PARP10/ARTD10 interacts with proliferating cell nuclear antigen (PCNA) and is required for DNA damage tolerance. *The Journal of biological chemistry* *289*, 13627-13637.
- Roper, S.J., Chrysanthou, S., Senner, C.E., Sienerth, A., Gnan, S., Murray, A., Masutani, M., Latos, P., and Hemberger, M. (2014). ADP-ribosyltransferases Parp1 and Parp7 safeguard pluripotency of ES cells. *Nucleic Acids Res* *42*, 8914-8927.
- Rouleau, M., Saxena, V., Rodrigue, A., Paquet, E.R., Gagnon, A., Hendzel, M.J., Masson, J.Y., Ekker, M., and Poirier, G.G. (2011). A key role for poly(ADP-ribose) polymerase 3 in ectodermal specification and neural crest development. *PLoS One* *6*, e15834.
- Saxena, A., Saffery, R., Wong, L.H., Kalitsis, P., and Choo, K.H. (2002). Centromere proteins Cenpa, Cenpb, and Bub3 interact with poly(ADP-ribose) polymerase-1 protein and are poly(ADP-ribosylated). *The Journal of biological chemistry* *277*, 26921-26926.
- Smith, S., Gariat, I., Schmitt, A., and de Lange, T. (1998). Tankyrase, a poly(ADP-ribose) polymerase at human telomeres. *Science* *282*, 1484-1487.
- Szanto, M., Brunyanszki, A., Kiss, B., Nagy, L., Gergely, P., Virag, L., and Bai, P. (2012). Poly(ADP-ribose) polymerase-2: emerging transcriptional roles of a DNA-repair protein. *Cell Mol Life Sci* *69*, 4079-4092.

- Tuncel, H., Tanaka, S., Oka, S., Nakai, S., Fukutomi, R., Okamoto, M., Ota, T., Kaneko, H., Tatsuka, M., and Shimamoto, F. (2012). PARP6, a mono(ADP-ribosyl) transferase and a negative regulator of cell proliferation, is involved in colorectal cancer development. *International journal of oncology* *41*, 2079-2086.
- van Zon, A., Mossink, M.H., Schoester, M., Houtsmuller, A.B., Scheffer, G.L., Scheper, R.J., Sonneveld, P., and Wiemer, E.A. (2003). The formation of vault-tubes: a dynamic interaction between vaults and vault PARP. *Journal of cell science* *116*, 4391-4400.
- Verheugd, P., Forst, A.H., Milke, L., Herzog, N., Feijs, K.L., Kremmer, E., Kleine, H., and Luscher, B. (2013). Regulation of NF-kappaB signalling by the mono-ADP-ribosyltransferase ARTD10. *Nat Commun* *4*, 1683.
- Vyas, S., Chesarone-Cataldo, M., Todorova, T., Huang, Y.H., and Chang, P. (2013). A systematic analysis of the PARP protein family identifies new functions critical for cell physiology. *Nat Commun* *4*, 2240.
- Welsby, I., Hutin, D., Gueydan, C., Kruys, V., Rongvaux, A., and Leo, O. (2014). PARP12, an Interferon-stimulated Gene Involved in the Control of Protein Translation and Inflammation. *The Journal of biological chemistry* *289*, 26642-26657.
- Wyrsh, P., Blenn, C., Bader, J., and Althaus, F.R. (2012). Cell death and autophagy under oxidative stress: roles of poly(ADP-Ribose) polymerases and Ca(2+). *Mol Cell Biol* *32*, 3541-3553.
- Yan, Q., Xu, R., Zhu, L., Cheng, X., Wang, Z., Manis, J., and Shipp, M.A. (2013). BAL1 and its partner E3 ligase, BBAP, link Poly(ADP-ribose) activation, ubiquitylation, and double-strand DNA repair independent of ATM, MDC1, and RNF8. *Mol Cell Biol* *33*, 845-857.
- Yeh, T.Y., Sbodio, J.I., Tsun, Z.Y., Luo, B., and Chi, N.W. (2007). Insulin-stimulated exocytosis of GLUT4 is enhanced by IRAP and its partner tankyrase. *The Biochemical journal* *402*, 279-290.
- Yu, M., Schreek, S., Cerni, C., Schamberger, C., Lesniewicz, K., Poreba, E., Vervoorts, J., Walsemann, G., Grotzinger, J., Kremmer, E., *et al.* (2005). PARP-10, a novel Myc-interacting protein with poly(ADP-ribose) polymerase activity, inhibits transformation. *Oncogene* *24*, 1982-1993.



**Table S2. The ADP-ribose interactome**

Source data used to generate the ADP-ribosylated interactomes shown in Figure 2. See Supplementary Text for criteria of data inclusion.

**Table S3. PARP specific substrates**

Source data used to generate the Euler diagrams showing PARP-1, PARP-2, PARP-10 and PARP-14 specific substrates in Figure 5.

**Table S4. Auto-modification sites identified on PARP-1**

Source data used to generate the PARP-1 auto-modification site map from Figure 6.

## **A cautionary note—the possibility of non-enzymatic ADP-ribosylation**

Non-enzymatic modification of amino acids by ADP-ribose has been identified by several pioneers in the field, including studies by Drs. Elaine and Myron Jacobson (e.g. Cervantes-Laurean et al., 1996), Joel Moss (e.g. McDonald and Moss, 1994), and mentioned in reviews by Drs. Alexander Bürkle (Bürkle, 2005), Guy Poirier (D'Amours et al., 1999) and Michael Hottiger (Hassa et al., 2006). These original studies clearly indicated the possibility for ADP-ribose to non-enzymatically conjugate to lysine, arginine and cysteine residues *in vitro*, using different analytical tools, including NMR, chromatography profile, and sensitivities to different chemicals. As stated in Cervantes-Laurean et al., 1996, the chemical conjugation of ADP-ribose (also known as glycation) was added to proteins in a concentration-dependent manner and can occur even within 8 minutes (the shortest timepoint sampled). Figure 5 in this 1996 paper further illustrated different rates of chemical ADP-ribosylation for different histones that have different numbers of lysines (e.g. H1 with 56 lysines incorporated less than H4 with 11 lysines), suggesting that the incorporation may not be random. Drawing a parallel to non-enzymatic glycation by glucose, only specific lysine residues in albumin are chemically conjugated *in vivo* (Iberg and Flückiger, 1986), therefore it is not clear whether each lysine is equally non-enzymatically modified.

Given the highly sensitive nature of state-of-the-art mass spectrometry, the stable nature of ADP-ribose-lysine/arginine bond and the use of enrichment tools to identify ADP-ribosylated sites, it is experimentally feasible to detect even low level of artificial “noise” from biological samples prepared for proteomics studies. We would like to note that ADP-ribose can be generated by (1) PARG/ARH3 conversion of PARylation sites to MARylation sites for site identification and/or potentially *in vivo* (Messner et al., 2010; Rosenthal et al., 2011), or (2) PARPs when acting as NADases (e.g., Desmarais et al., 1991). In addition, ADP-ribose has been used as an elution condition for macrodomain enrichment for ADP-ribosylated proteins (Dani et al., 2009), which would not be a problem in identifying substrates; however, the excessive amount of free ADP-ribose used for elution could potentially chemically conjugate the substrates in the eluates *in vitro*, resulting in the identification of non-physiological ADP-ribosylation sites by mass spectrometry. Given that the effect of chemical conjugation by ADP-ribose in proteomic studies remains uncertain, the field would greatly benefit from performing a series of experiments to clearly establish whether or not non-enzymatic ADP-ribosylation should be a concern for proteomics studies.

## Criteria for proteomics datasets analyzed in Supplementary Table 2

We have analyzed all four proteomic studies undertaken so far that identify ADP-ribosylated substrates along with their interactors (i.e., the ADP-ribosylated interactome) (Gagné et al., 2008; 2012; Isabelle et al., 2012; Jungmichel et al., 2013). We note that the Jungmichel *et al* 2013 study is aimed at mapping ADP-ribosylated targets (substrates) during DNA damage. However, based on the materials and methods in Jungmichel *et al* (2013), PAR enrichment was performed in cell lysis buffer containing 50 mM Tris pH 7.5, 150 mM NaCl, 1 mM EDTA, 0.5% NP-40, 0.05% sodium deoxycholate, protease inhibitors, phosphatase inhibitors, PARG inhibitor and PARP inhibitor. This buffer most closely resembles the modified RIPA buffer commonly used in proteomics for protein–protein interactome enrichment (e.g. by the Matthias’ Mann group in Ong and Mann, 2006), though contains less of the ionic detergent which represents the harshest denaturant in the buffer (0.05% sodium deoxycholate vs. 0.25% in Ong and Mann, 2006). Standard RIPA buffer, which contains 1% sodium deoxycholate, is also commonly employed for the study of protein-protein interactions (Sefton, 2001). Therefore, conservatively, it can reasonably be assumed that the proteins identified in this study constitute ADP-ribosylated interactome, i.e. ADP-ribosylated proteins, ADP-ribose interactors, and protein–protein interaction partners of both the former and latter. However, we noted that the lysis conditions used are slightly more stringent than those used by Poirier and co-workers in their 2008 and 2012 studies as summarized in Figure 2A (Gagné et al., 2008; 2012; Isabelle et al., 2012). Using the current set of 384 ADP-ribosylated substrates with defined sites mapped (Daniels et al., 2014; Zhang et al., 2013), 82 of these proteins overlap with the Jungmichel 2013 data, accounting for ~35% of their Af1521 macrodomain-enriched proteome. On the other hand, there are 28 proteins overlapping with the Gagné 2012 data, accounting for a comparable ~33% of their Af1521 macrodomain-enriched proteome (see Figure S2 above). The differences in induction, lysis and enrichment conditions, cell lines as well as limited sampling, in general, could all contribute to the different degrees of overlap. The actual proportion of ADP-ribosylated substrates vs. binding proteins found in these respective studies can be determined with approaches that identify specific sites of ADP-ribosylation in future studies. Given that the condition reported in Jungmichel et al (2013) cannot exclude the inclusion of proteins that binds to ADP-ribosylated substrates, we therefore take a conservative approach and discuss the paper in the context among other pioneering works of ADP-ribosylated interactomes.

In order to control the many variables present in the meta-analysis presented in Figure 2B, the proteins identified through PARG-dead enrichment were omitted, as they represent a single dataset, whereas the 10H (Gagné et al., 2008; 2012; Isabelle et al., 2012) and macrodomain (Gagné et al., 2008; Jungmichel et al., 2013) enriched protein groups represent at least two independent datasets.

## References:

Bürkle, A. (2005). Poly(ADP-ribose). The most elaborate metabolite of NAD. *FEBS J* *272*, 4576–4589.

Cervantes-Laurean, D., Jacobson, E.L., and Jacobson, M.K. (1996). Glycation and glycooxidation of histones by ADP-ribose. *J Biol Chem* *271*, 10461–10469.

D'Amours, D., Desnoyers, S., D'Silva, I., and Poirier, G.G. (1999). Poly(ADP-ribose)ylation reactions in the regulation of nuclear functions. *Biochem J* *342 ( Pt 2)*, 249–268.

Dani, N., Stilla, A., Marchegiani, A., Tamburro, A., Till, S., Ladurner, A.G., Corda, D., and Di Girolamo, M. (2009). Combining affinity purification by ADP-ribose-binding macro domains with mass spectrometry to define the mammalian ADP-ribosyl proteome. *Proc Natl Acad Sci USA* *106*, 4243–4248.

Daniels, C.M., Ong, S.-E., and Leung, A.K.L. (2014). Phosphoproteomic Approach to Characterize Protein Mono- and Poly(ADP-ribose)ylation Sites from Cells. *J Proteome Res.* *3*, 3510–3522

Desmarais, Y., Ménard, L., Lagueur, J., and Poirier, G.G. (1991). Enzymological properties of poly(ADP-ribose)polymerase: characterization of automodification sites and NADase activity. *Biochim Biophys Acta* *1078*, 179–186.

Gagné, J.-P., Isabelle, M., Lo, K.S., Bourassa, S., Hendzel, M.J., Dawson, V.L., Dawson, T.M., and Poirier, G.G. (2008). Proteome-wide identification of poly(ADP-ribose) binding proteins and poly(ADP-ribose)-associated protein complexes. *Nucleic Acids Res* *36*, 6959–6976.

Gagné, J.-P., Pic, E., Isabelle, M., Krietsch, J., Ethier, C., Paquet, E., Kelly, I., Boutin, M., Moon, K.-M., Foster, L.J., et al. (2012). Quantitative proteomics profiling of the poly(ADP-ribose)-related response to genotoxic stress. *Nucleic Acids Res* *40*, 7788–7805.

Hassa, P.O., Haenni, S.S., Elser, M., and Hottiger, M.O. (2006). Nuclear ADP-riboseylation reactions in mammalian cells: where are we today and where are we going? *Microbiol. Mol. Biol. Rev.* *70*, 789–829.

Iberg, N., and Flückiger, R. (1986). Nonenzymatic glycosylation of albumin in vivo. Identification of multiple glycosylated sites. *J Biol Chem* *261*, 13542–13545.

Isabelle, M., Gagné, J.-P., Gallouzi, I.-E., and Poirier, G.G. (2012). Quantitative proteomics and dynamic imaging reveal that G3BP-mediated stress granule assembly is poly(ADP-ribose)-dependent following exposure to MNNG-induced DNA alkylation. *J Cell Sci* *125*, 4555–4566.

Jungmichel, S., Rosenthal, F., Altmeyer, M., Lukas, J., Hottiger, M.O., and Nielsen, M.L. (2013). Proteome-wide Identification of Poly(ADP-Ribosyl)ation Targets in Different Genotoxic Stress Responses. *Mol. Cell* *52*, 272–285

McDonald, L.J., and Moss, J. (1994). Enzymatic and nonenzymatic ADP-ribosylation of cysteine. *Mol Cell Biochem* *138*, 221–226.

Messner, S., Altmeyer, M., Zhao, H., Pozivil, A., Roschitzki, B., Gehrig, P., Rutishauser, D., Huang, D., Caflisch, A., and Hottiger, M.O. (2010). PARP1 ADP-ribosylates lysine residues of the core histone tails. *Nucleic Acids Res* *38*, 6350–6362.

Ong, S.-E., and Mann, M. (2006). A practical recipe for stable isotope labeling by amino acids in cell culture (SILAC). *Nat Protoc* *1*, 2650–2660.

Rosenthal, F., Messner, S., Roschitzki, B., Gehrig, P., Nanni, P., and Hottiger, M.O. (2011). Identification of distinct amino acids as ADP-ribose acceptor sites by mass spectrometry. *Methods Mol Biol* *780*, 57–66.

Sefton, B.M. (2001). Labeling cultured cells with  $^{32}\text{P}_i$  and preparing cell lysates for immunoprecipitation. *Curr Protoc Cell Biol* *Chapter 14*, Unit14.4.

Zhang, Y., Wang, J., Ding, M., and Yu, Y. (2013). Site-specific characterization of the Asp- and Glu-ADP-ribosylated proteome. *Nat Methods* *10*, 981–984
